# Supplementary material for: Machine learning from quantum chemistry to predict experimental solvent effects on reaction rates
Source: Royal Society of Chemistry journal article supplement (doi:10.1039/d3sc05353a), 2024-01-01
Supplement: d3sc05353a1.pdf [file d3sc05353a1.pdf]

## Supporting Information for:

# Machine learning from quantum chemistry to predict experimental solvent effects on reaction rates

Yunsie Chung<sup>†</sup> and William H. Green<sup>\*,†</sup>

*<sup>†</sup>Department of Chemical Engineering, Massachusetts Institute of Technology, Cambridge,  
MA, 02139, U.S.A*

E-mail: whgreen@mit.edu

## S1 Details on the pre-training data set

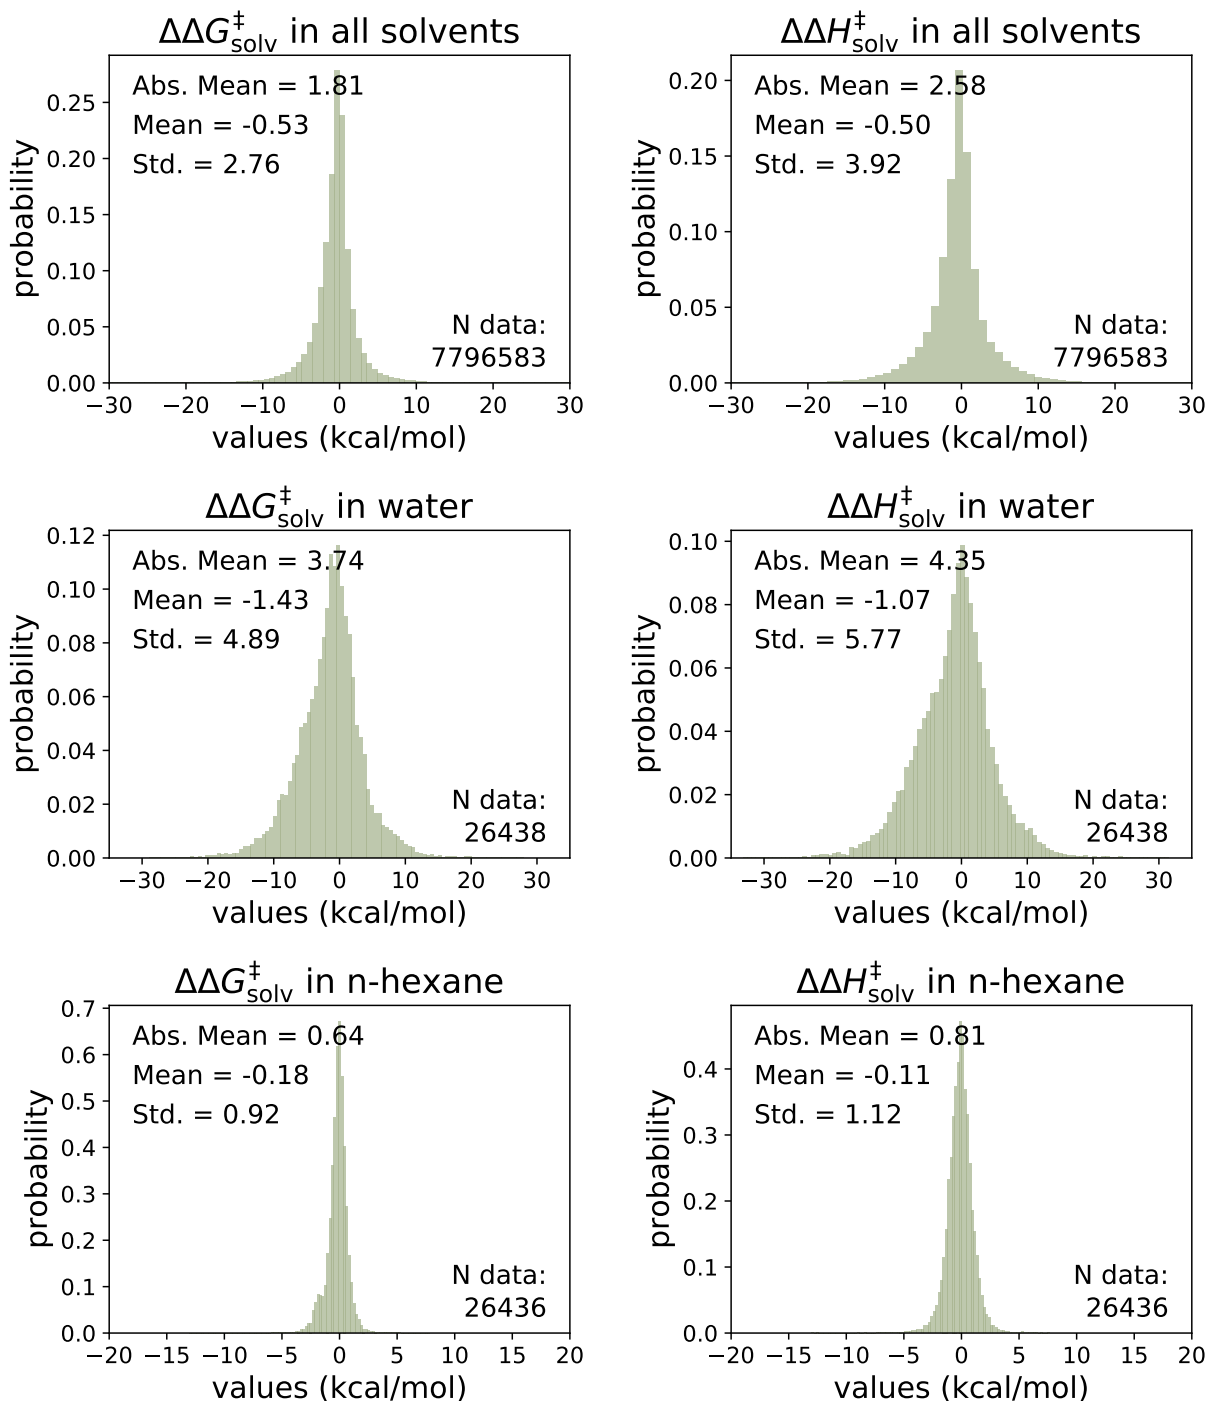

Figure S1: Distributions of the pre-training data set for the reactions in all solvents (top), in water (middle), and in n-hexane (bottom). The absolute mean (abs. mean), mean and standard deviation (std.) are in kcal/mol. Water and n-hexane are chosen as sample solvents for data visualization.

## S2 Details on the fine-tuning data set

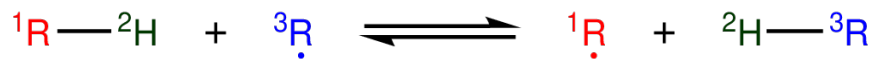

(a) Bimolecular hydrogen abstraction

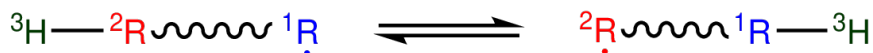

(b) Unimolecular hydrogen migration

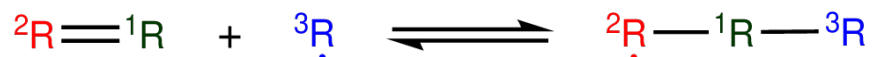

(c) Radical addition to a multiple bond

Figure S2: Templates of the reaction types found in the fine-tuning set.

A subset of the fine-tuning data set was selected for the model training. Around 25 solvents were sampled per each reaction with following procedure:

- Water, acetic acid, and acetonitrile are always included.
- Randomly sample 17 solvents from the following list of 44 more common solvents: carbon tetrachloride, benzene, tert-Butanol, hexane, anisole, T-amyl alcohol, ethyl acetate, propionitrile, chlorobenzene, methylformate, dioxane, tetrahydrofuran, tetrachloroethylene, bromobenzene, benzonitrile, cyclohexane, diethyl ether, methanol, 2-propanol, dichloromethane, chloroform, sulfolane, DMF, ethanol, 2,2,2-trifluoroethanol, acetone, toluene, isopropyl ether, veratrole, nitrobenzene, nitromethane, triethylene glycol, N-benzylacetamide, formamide, ethylene glycol, 2-methoxyethanol, benzyl alcohol, 2-phenoxyethanol, N-methylformamide, dimethyl sulfoxide, glycerol, isooctane, 3-methyl-3-pentanol, and 1-butanol.
- Sample 5 solvents from the remaining solvents.

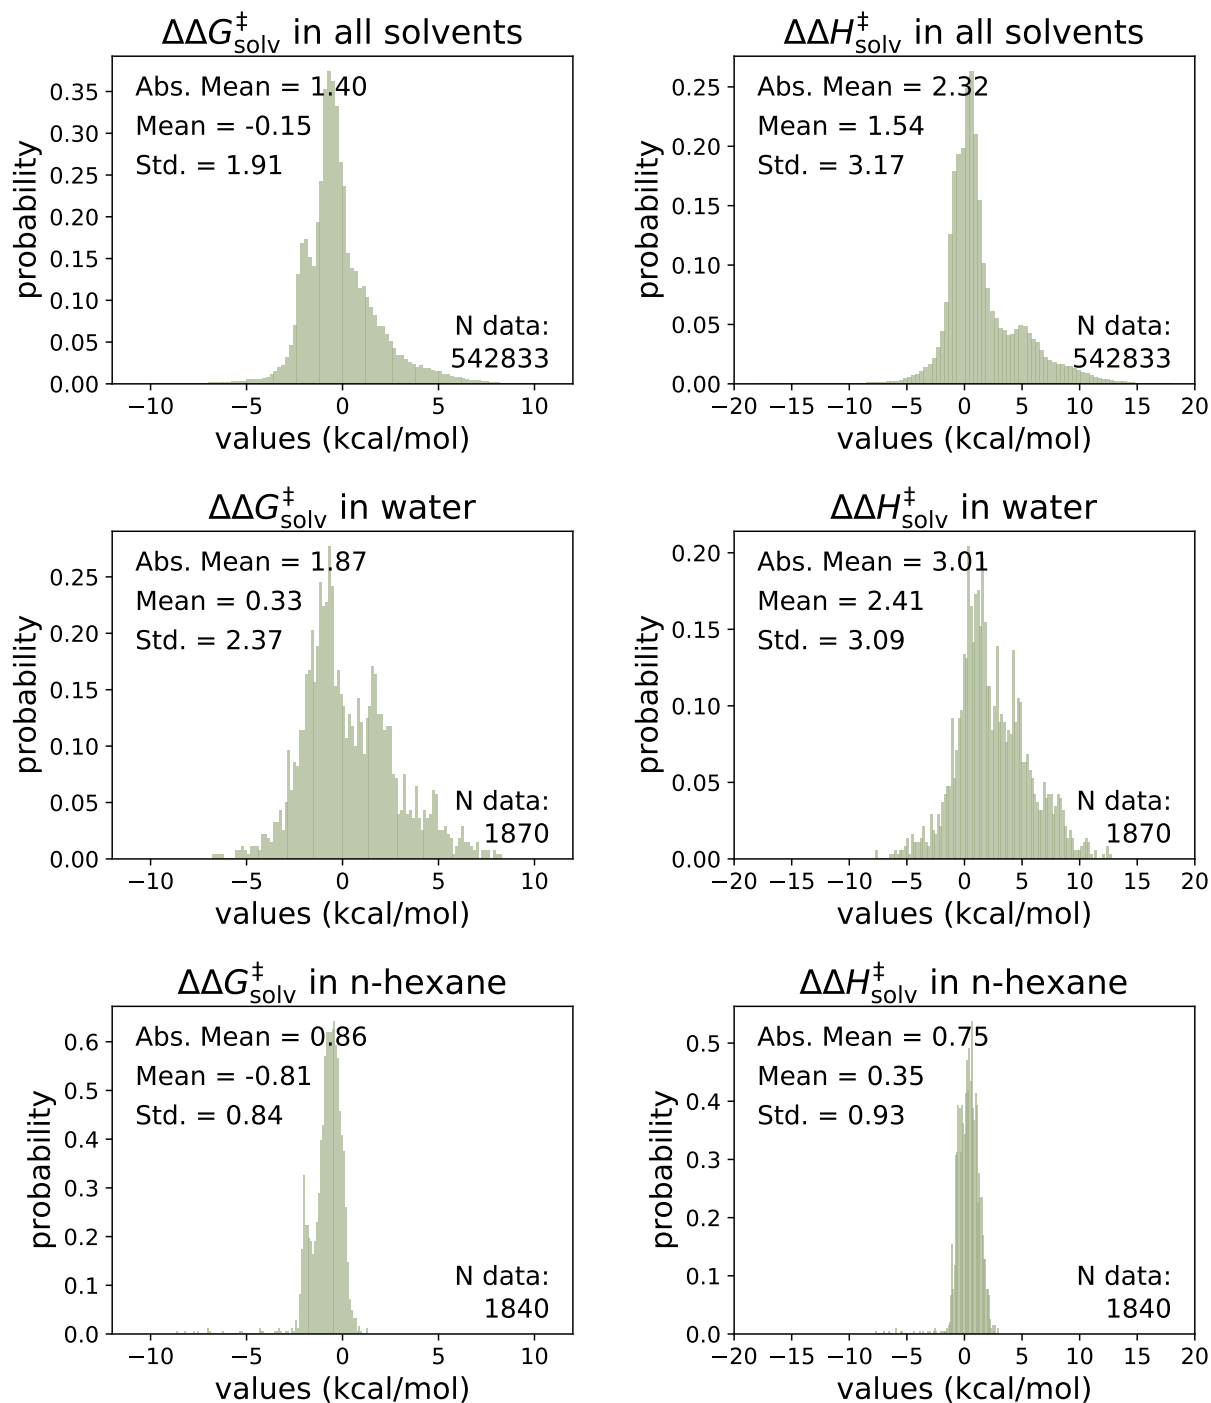

Figure S3: Distributions of the fine-tuning data set for the reactions in all solvents (top), in water (middle), and in n-hexane (bottom). The absolute mean (abs. mean), mean and standard deviation (std.) are in kcal/mol. Water and n-hexane are chosen as sample solvents for data visualization.

## S3 Reactions in the experimental set

Table S1: List of reactions found in the experimental set.

| Index | Reaction                                                                                                                                           |
|-------|----------------------------------------------------------------------------------------------------------------------------------------------------|
| 1     | 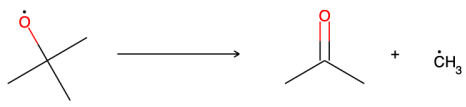 <p style="text-align: center;"><math>\beta</math>-scission</p>  |
| 2     |  <p style="text-align: center;"><math>\beta</math>-scission</p>  |
| 3     |  <p style="text-align: center;">H-abstraction</p>                |
| 4     |  <p style="text-align: center;">H-abstraction</p>              |
| 5     |  <p style="text-align: center;">H-abstraction</p>              |
| 6     |  <p style="text-align: center;">H-abstraction <sup>a</sup></p> |
| 7     |  <p style="text-align: center;">H-abstraction</p>              |

|    |                                                                                                                                                                                         |
|----|-----------------------------------------------------------------------------------------------------------------------------------------------------------------------------------------|
| 8  | 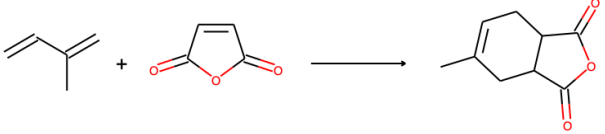 <p style="text-align: center;">Diels-Alder</p>                                                       |
| 9  |  <p style="text-align: center;">Diels-Alder</p>                                                       |
| 10 |  <p style="text-align: center;">Diels-Alder</p>                                                       |
| 11 |  <p style="text-align: center;">[2+2] Cycloaddition</p>                                              |
| 12 |  <p style="text-align: center;">Nucleophilic addition to carbon-carbon triple bond <sup>b</sup></p> |
| 13 |  <p style="text-align: center;">Epoxidation of cyclohexene with peroxycarboxylic acid</p>           |
| 14 |  <p style="text-align: center;">Thermal decomposition of 3-sulfolene</p>                            |

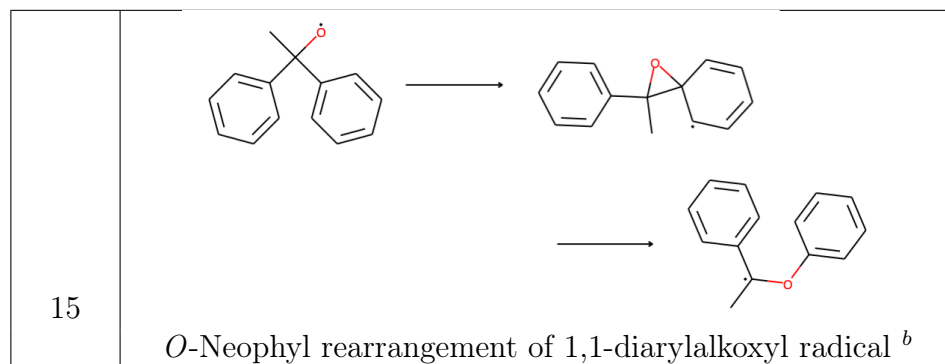

<sup>a</sup> The rates constants of Reaction 6 are reported relative to the rate constants of Reaction 1. <sup>b</sup> The first step was used for the ML predictions for these reactions as the first step was previously identified as a rate limiting step.

## S4 Details on the ML model

Table S2: Default atom and bond features used for the model.

| <b>Atom features</b>     | <b>Type</b> | <b>Bond features</b> | <b>Type</b> |
|--------------------------|-------------|----------------------|-------------|
| Atomic number            | One-hot     | Bond type            | One-hot     |
| Number of bonds          | One-hot     | Conjugation          | One-hot     |
| Formal charge            | One-hot     | In ring              | One-hot     |
| Ring size                | One-hot     | Stereo               | One-hot     |
| Connected hydrogen atoms | One-hot     |                      |             |
| Hybridization            | One-hot     |                      |             |
| Aromaticity              | One-hot     |                      |             |
| Molar mass               | Numeric     |                      |             |

Table S3: Optimized hyperparameters.

| Type                                 | Optimized value             |
|--------------------------------------|-----------------------------|
| D-MPNN hidden size                   | Reaction: 900, Solvent: 200 |
| D-MPNN depth                         | Reaction: 4, Solvent: 2     |
| D-MPNN bias                          | No                          |
| Aggregation                          | Normalized                  |
| FNN hidden size                      | 400                         |
| FNN depth                            | 6                           |
| FNN bias                             | Yes                         |
| Activation function                  | ReLu                        |
| Dropout                              | 0.0                         |
| Batch size                           | 30                          |
| Warm-up epochs                       | 4                           |
| Max epochs for pre-training          | 80                          |
| Max epochs for fine-tuning           | 10                          |
| Learning rates (initial, max, final) | 1.8e-4, 2.2e-4, 5.2e-5      |



## S5 Results on the pre-training set

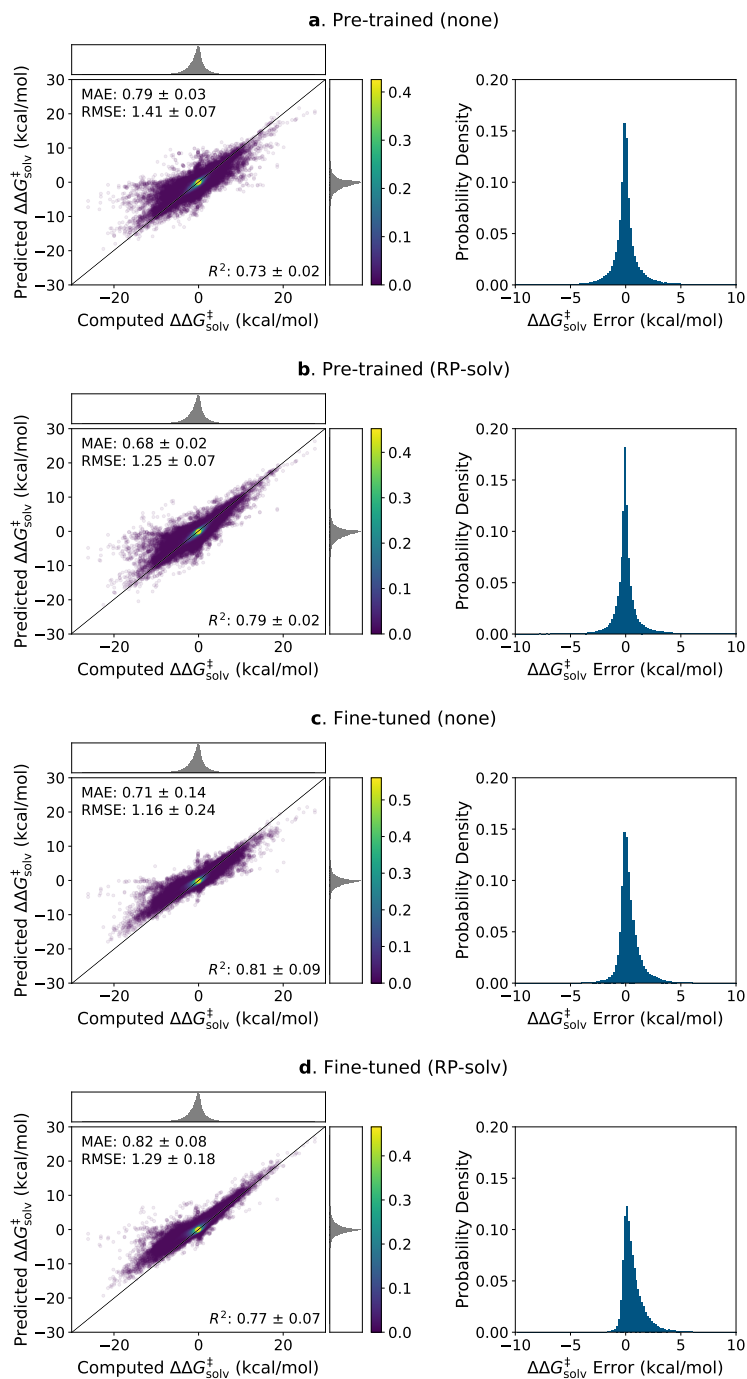

Figure S4: Parity plots and histograms of the  $\Delta\Delta G_{\text{solv}}^{\ddagger}$  errors on the 5-fold pre-training set reaction split. (a) The pre-trained model with no additional feature. (b) The pre-trained model with the RP-solv feature. (c) The fine-tuned model with no additional feature. (d) The fine-tuned model with the RP-solv feature. The MAE and RMSE are in kcal/mol. The numbers of reactions, solvents, total data points found in the test set are provided.

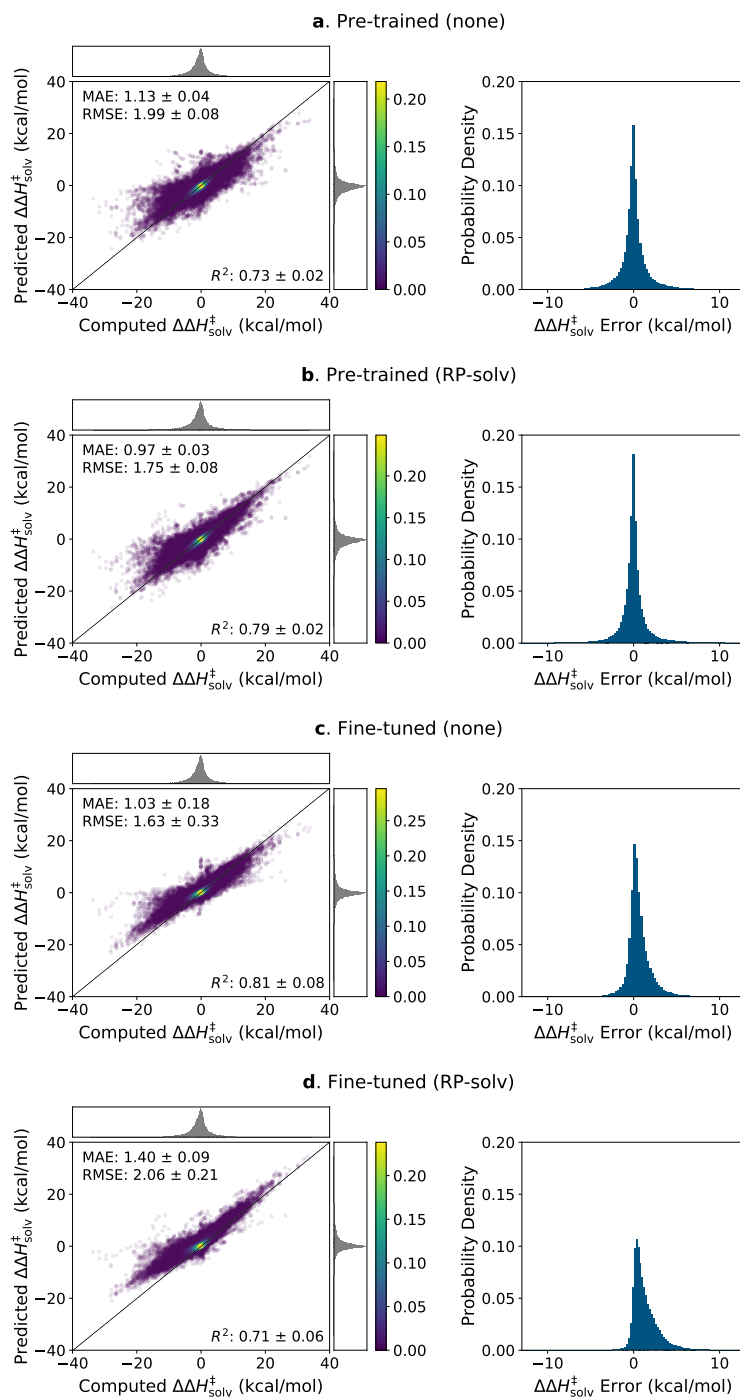

Figure S5: Parity plots and histograms of the  $\Delta\Delta H_{\text{solv}}^{\ddagger}$  errors on the 5-fold pre-training set reaction split. (a) The pre-trained model with no additional feature. (b) The pre-trained model with the RP-solv feature. (c) The fine-tuned model with no additional feature. (d) The fine-tuned model with the RP-solv feature. The MAE and RMSE are in kcal/mol. The numbers of reactions, solvents, total data points found in the test set are provided.

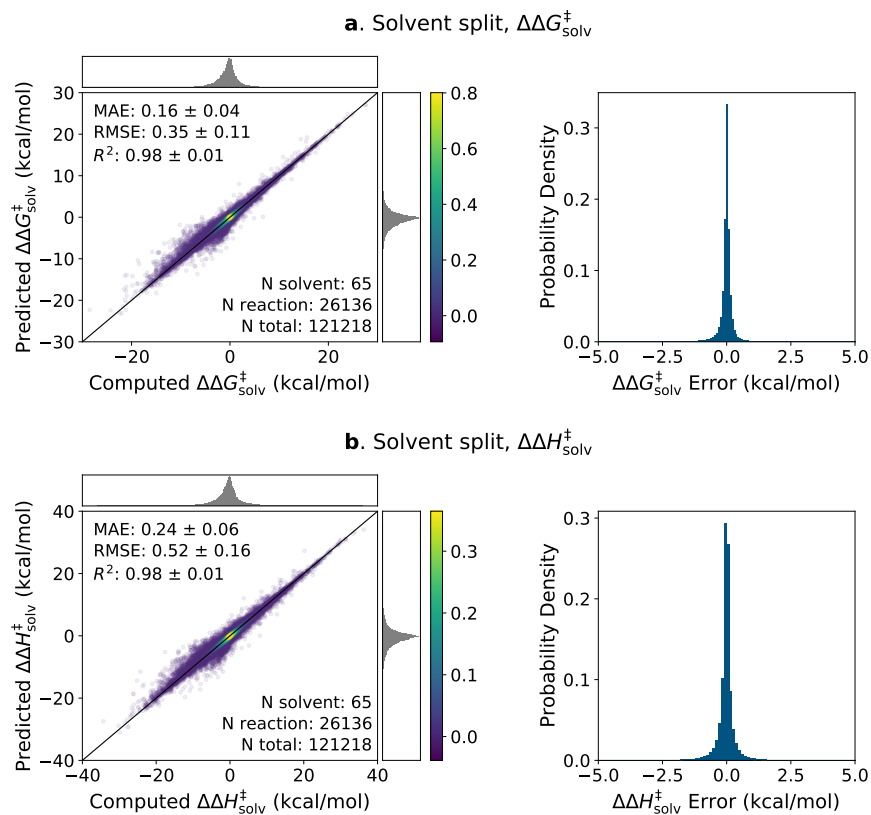

Figure S6: Parity plots and histograms of the test errors on the 5-fold pre-training set solvent split. The results correspond to the pre-trained model with the RP-solv feature. (a)  $\Delta\Delta G_{\text{solv}}^\ddagger$  results. (b)  $\Delta\Delta H_{\text{solv}}^\ddagger$  results. The MAE and RMSE are in kcal/mol. The numbers of reactions, solvents, total data points found in the test set are provided.

Table S4: Top 20 reactions with the highest RMSE on the pre-training test set with the reaction split. The test errors are computed with the fine-tuned model with no additional feature. The RMSE, mean  $\Delta\Delta G_{\text{solv}}^\ddagger$  of the reaction across different solvents, and gas phase barrier height ( $E_{a, \text{gas}}$ ) are shown in kcal/mol for both forward and reverse directions. The gas phase barrier heights are obtained from the published works by Grambow et al.<sup>1;2;3</sup>

| Rank | Reaction                                                                                                                                                                                                                                                                                                                                                                   |
|------|----------------------------------------------------------------------------------------------------------------------------------------------------------------------------------------------------------------------------------------------------------------------------------------------------------------------------------------------------------------------------|
| 1    | 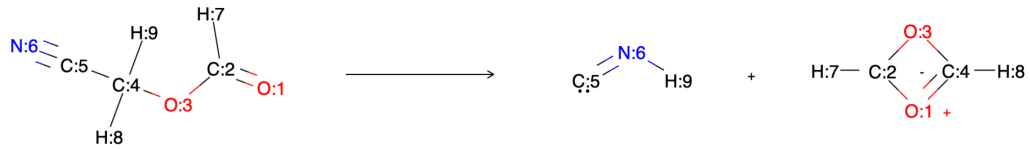 <p><b>Forward:</b> RMSE = 10.39, Mean <math>\Delta\Delta G_{\text{solv}}^\ddagger</math> = -15.13 <math>E_{a, \text{gas}}</math> = 106.82<br/> <b>Reverse:</b> RMSE = 8.46, Mean <math>\Delta\Delta G_{\text{solv}}^\ddagger</math> = -11.48 <math>E_{a, \text{gas}}</math> = 11.27</p> |
| 2    |  <p><b>Forward:</b> RMSE = 8.07, Mean <math>\Delta\Delta G_{\text{solv}}^\ddagger</math> = -7.29 <math>E_{a, \text{gas}}</math> = 118.41<br/> <b>Reverse:</b> RMSE = 8.28, Mean <math>\Delta\Delta G_{\text{solv}}^\ddagger</math> = -7.61 <math>E_{a, \text{gas}}</math> = 109.81</p>   |
| 3    |  <p><b>Forward:</b> RMSE = 8.04, Mean <math>\Delta\Delta G_{\text{solv}}^\ddagger</math> = -9.73 <math>E_{a, \text{gas}}</math> = 61.96<br/> <b>Reverse:</b> RMSE = 5.26, Mean <math>\Delta\Delta G_{\text{solv}}^\ddagger</math> = -3.68 <math>E_{a, \text{gas}}</math> = 37.76</p>   |
| 4    |  <p><b>Forward:</b> RMSE = 5.39, Mean <math>\Delta\Delta G_{\text{solv}}^\ddagger</math> = -4.70 <math>E_{a, \text{gas}}</math> = 73.75<br/> <b>Reverse:</b> RMSE = 7.78, Mean <math>\Delta\Delta G_{\text{solv}}^\ddagger</math> = -7.34 <math>E_{a, \text{gas}}</math> = 64.63</p>   |

|   |                                                                                                                                                                                                                                                                                                                                                                          |
|---|--------------------------------------------------------------------------------------------------------------------------------------------------------------------------------------------------------------------------------------------------------------------------------------------------------------------------------------------------------------------------|
| 5 | 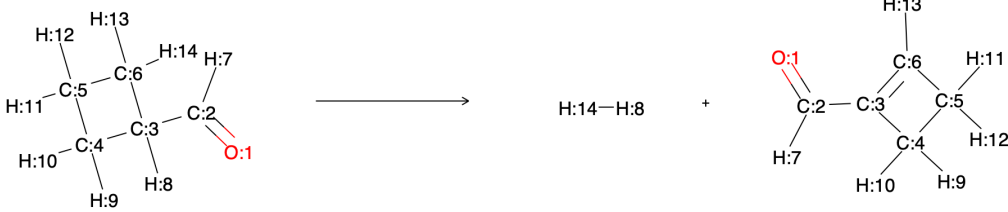 <p><b>Forward:</b> RMSE = 6.96, Mean <math>\Delta\Delta G_{\text{solv}}^\ddagger = -7.34</math> <math>E_{a, \text{gas}} = 100.61</math><br/> <b>Reverse:</b> RMSE = 7.62, Mean <math>\Delta\Delta G_{\text{solv}}^\ddagger = -9.66</math> <math>E_{a, \text{gas}} = 69.47</math></p>  |
| 6 |  <p><b>Forward:</b> RMSE = 6.18, Mean <math>\Delta\Delta G_{\text{solv}}^\ddagger = -7.94</math> <math>E_{a, \text{gas}} = 91.40</math><br/> <b>Reverse:</b> RMSE = 6.67, Mean <math>\Delta\Delta G_{\text{solv}}^\ddagger = -9.90</math> <math>E_{a, \text{gas}} = 90.10</math></p>   |
| 7 |  <p><b>Forward:</b> RMSE = 4.54, Mean <math>\Delta\Delta G_{\text{solv}}^\ddagger = -5.39</math> <math>E_{a, \text{gas}} = 64.93</math><br/> <b>Reverse:</b> RMSE = 6.51, Mean <math>\Delta\Delta G_{\text{solv}}^\ddagger = -8.10</math> <math>E_{a, \text{gas}} = 68.22</math></p> |
| 8 |  <p><b>Forward:</b> RMSE = 6.51, Mean <math>\Delta\Delta G_{\text{solv}}^\ddagger = -7.66</math> <math>E_{a, \text{gas}} = 82.50</math><br/> <b>Reverse:</b> RMSE = 0.73, Mean <math>\Delta\Delta G_{\text{solv}}^\ddagger = 3.63</math> <math>E_{a, \text{gas}} = 48.45</math></p>  |

|    |                                                                                                                                                                                                                                                                                                                                                                           |
|----|---------------------------------------------------------------------------------------------------------------------------------------------------------------------------------------------------------------------------------------------------------------------------------------------------------------------------------------------------------------------------|
| 9  | 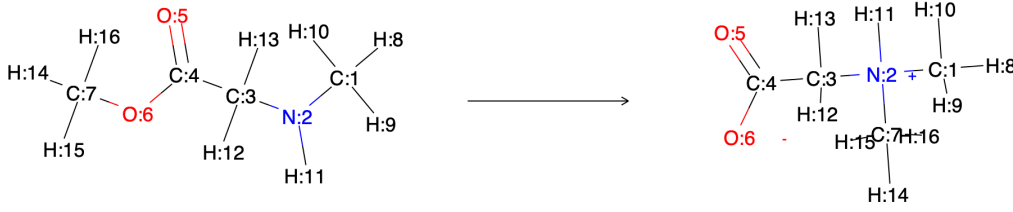 <p><b>Forward:</b> RMSE = 4.92, Mean <math>\Delta\Delta G_{\text{solv}}^\ddagger = -7.85</math> <math>E_{a, \text{gas}} = 67.94</math><br/> <b>Reverse:</b> RMSE = 6.49, Mean <math>\Delta\Delta G_{\text{solv}}^\ddagger = 8.41</math> <math>E_{a, \text{gas}} = 47.89</math></p>     |
| 10 |  <p><b>Forward:</b> RMSE = 5.88, Mean <math>\Delta\Delta G_{\text{solv}}^\ddagger = -3.05</math> <math>E_{a, \text{gas}} = 82.90</math><br/> <b>Reverse:</b> RMSE = 4.58, Mean <math>\Delta\Delta G_{\text{solv}}^\ddagger = -2.10</math> <math>E_{a, \text{gas}} = 58.42</math></p>    |
| 11 |  <p><b>Forward:</b> RMSE = 5.82, Mean <math>\Delta\Delta G_{\text{solv}}^\ddagger = -11.18</math> <math>E_{a, \text{gas}} = 56.95</math><br/> <b>Reverse:</b> RMSE = 4.03, Mean <math>\Delta\Delta G_{\text{solv}}^\ddagger = -7.00</math> <math>E_{a, \text{gas}} = 35.19</math></p>  |
| 12 |  <p><b>Forward:</b> RMSE = 5.81, Mean <math>\Delta\Delta G_{\text{solv}}^\ddagger = -6.83</math> <math>E_{a, \text{gas}} = 95.34</math><br/> <b>Reverse:</b> RMSE = 5.33, Mean <math>\Delta\Delta G_{\text{solv}}^\ddagger = -6.12</math> <math>E_{a, \text{gas}} = 119.94</math></p> |

|    |                                                                                                                                                                                                                                                                                                                                                                          |
|----|--------------------------------------------------------------------------------------------------------------------------------------------------------------------------------------------------------------------------------------------------------------------------------------------------------------------------------------------------------------------------|
| 13 |  <p><b>Forward:</b> RMSE = 3.39, Mean <math>\Delta\Delta G_{\text{solv}}^\ddagger = -2.42</math> <math>E_{a, \text{gas}} = 63.52</math><br/> <b>Reverse:</b> RMSE = 5.78, Mean <math>\Delta\Delta G_{\text{solv}}^\ddagger = -0.22</math> <math>E_{a, \text{gas}} = 2.80</math></p>    |
| 14 |  <p><b>Forward:</b> RMSE = 5.68, Mean <math>\Delta\Delta G_{\text{solv}}^\ddagger = -6.69</math> <math>E_{a, \text{gas}} = 87.57</math><br/> <b>Reverse:</b> RMSE = 2.40, Mean <math>\Delta\Delta G_{\text{solv}}^\ddagger = -3.05</math> <math>E_{a, \text{gas}} = 73.83</math></p>   |
| 15 |  <p><b>Forward:</b> RMSE = 5.61, Mean <math>\Delta\Delta G_{\text{solv}}^\ddagger = -6.09</math> <math>E_{a, \text{gas}} = 77.90</math><br/> <b>Reverse:</b> RMSE = 4.87, Mean <math>\Delta\Delta G_{\text{solv}}^\ddagger = -5.28</math> <math>E_{a, \text{gas}} = 30.34</math></p> |
| 16 |  <p><b>Forward:</b> RMSE = 5.43, Mean <math>\Delta\Delta G_{\text{solv}}^\ddagger = -4.63</math> <math>E_{a, \text{gas}} = 105.63</math><br/> <b>Reverse:</b> RMSE = 4.57, Mean <math>\Delta\Delta G_{\text{solv}}^\ddagger = -3.52</math> <math>E_{a, \text{gas}} = 8.89</math></p> |

|    |                                                                                                                                                                                                                                                                                                                                                                              |
|----|------------------------------------------------------------------------------------------------------------------------------------------------------------------------------------------------------------------------------------------------------------------------------------------------------------------------------------------------------------------------------|
| 17 | 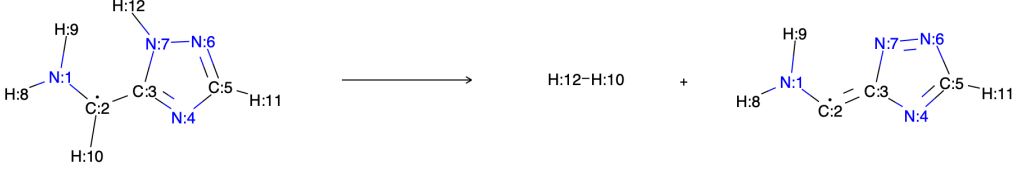 <p><b>Forward:</b> RMSE = 5.29, Mean <math>\Delta\Delta G_{\text{solv}}^{\ddagger}</math> = -4.12 <math>E_{a, \text{gas}}</math> = 76.20<br/> <b>Reverse:</b> RMSE = 0.35, Mean <math>\Delta\Delta G_{\text{solv}}^{\ddagger}</math> = -0.82 <math>E_{a, \text{gas}}</math> = 5.24</p>    |
| 18 |  <p><b>Forward:</b> RMSE = 5.24, Mean <math>\Delta\Delta G_{\text{solv}}^{\ddagger}</math> = -11.53 <math>E_{a, \text{gas}}</math> = 93.04<br/> <b>Reverse:</b> RMSE = 0.31, Mean <math>\Delta\Delta G_{\text{solv}}^{\ddagger}</math> = 0.28 <math>E_{a, \text{gas}}</math> = 22.60</p>   |
| 19 |  <p><b>Forward:</b> RMSE = 3.74, Mean <math>\Delta\Delta G_{\text{solv}}^{\ddagger}</math> = -6.78 <math>E_{a, \text{gas}}</math> = 58.09<br/> <b>Reverse:</b> RMSE = 5.23, Mean <math>\Delta\Delta G_{\text{solv}}^{\ddagger}</math> = -7.67 <math>E_{a, \text{gas}}</math> = 83.93</p>  |
| 20 |  <p><b>Forward:</b> RMSE = 5.15, Mean <math>\Delta\Delta G_{\text{solv}}^{\ddagger}</math> = -6.35 <math>E_{a, \text{gas}}</math> = 86.67<br/> <b>Reverse:</b> RMSE = 4.36, Mean <math>\Delta\Delta G_{\text{solv}}^{\ddagger}</math> = -3.85 <math>E_{a, \text{gas}}</math> = 18.28</p> |



Table S5: Examples of reactions found in the 10 most frequent reaction types

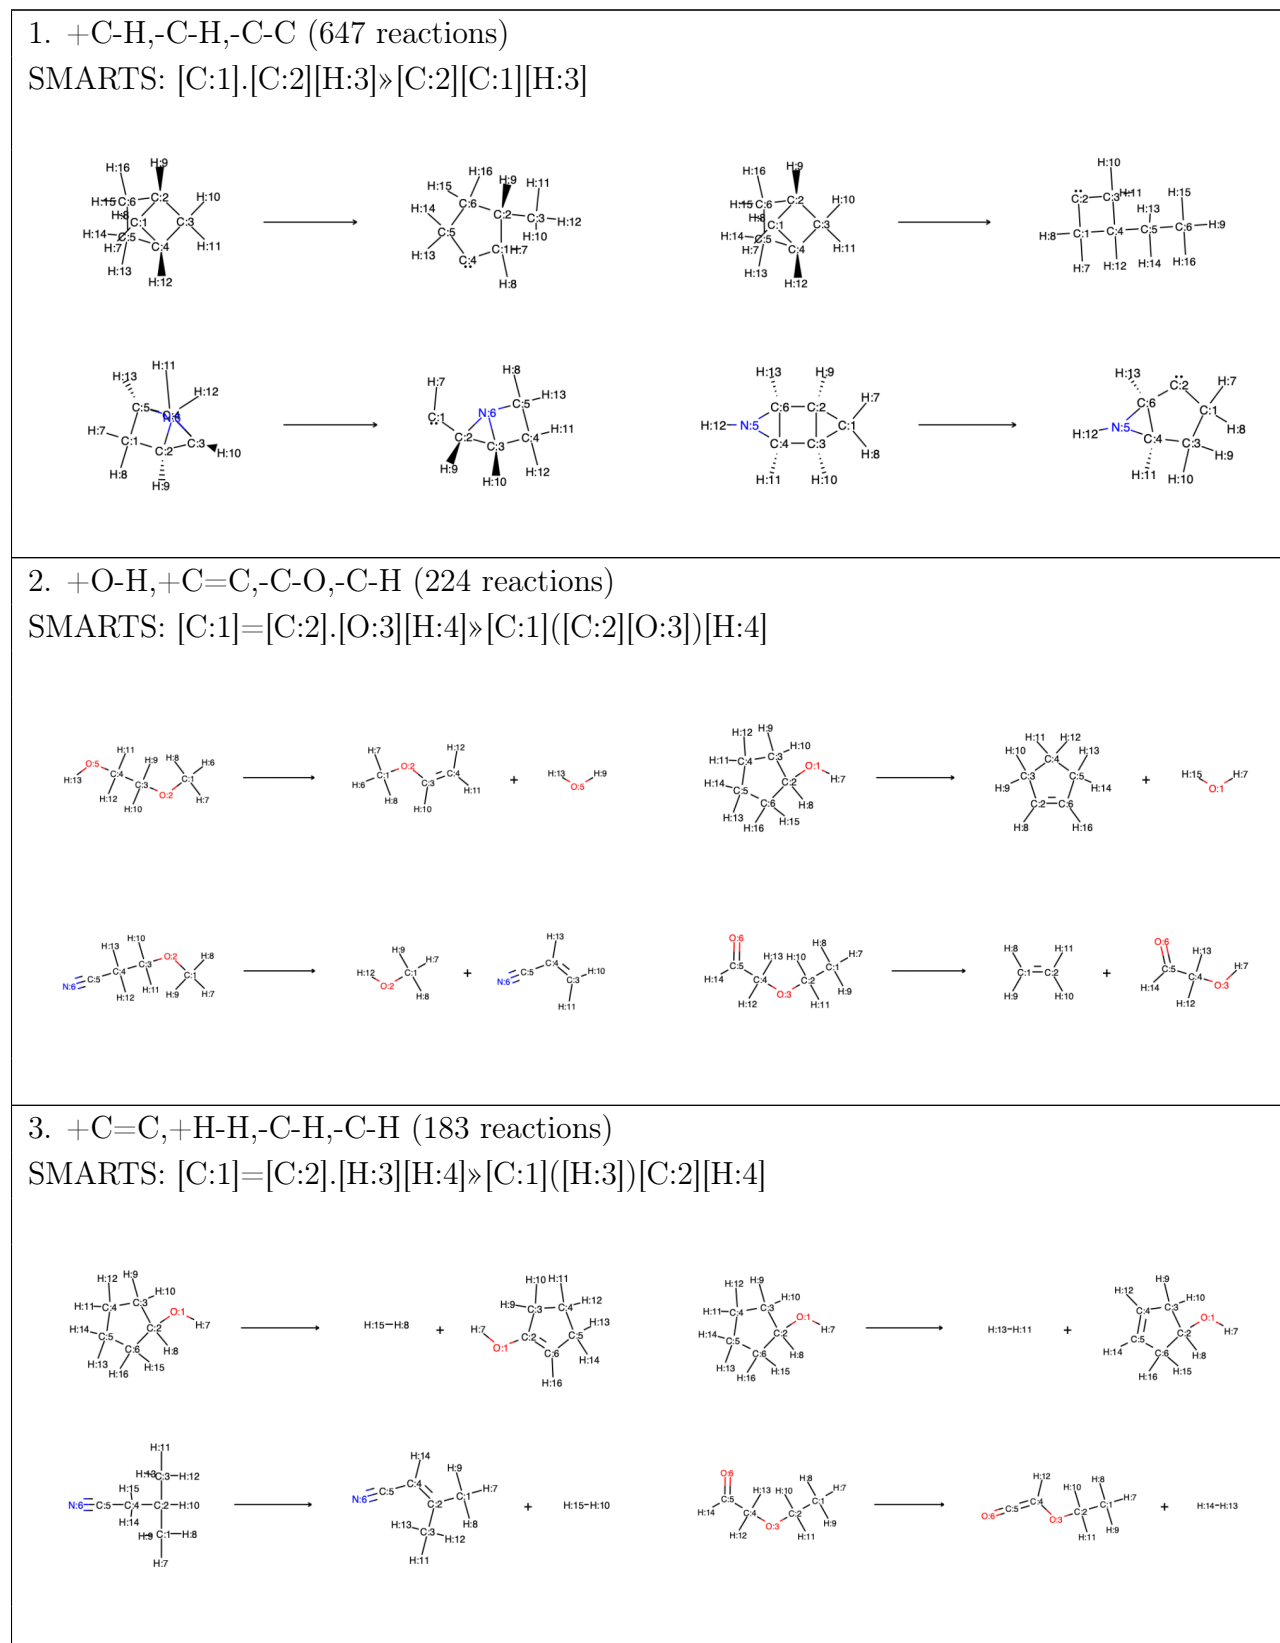

4. +C-O,-C-O,-C-C (133 reactions)

SMARTS: [C:1].[C:2][O:3]»[C:2][C:1][O:3]

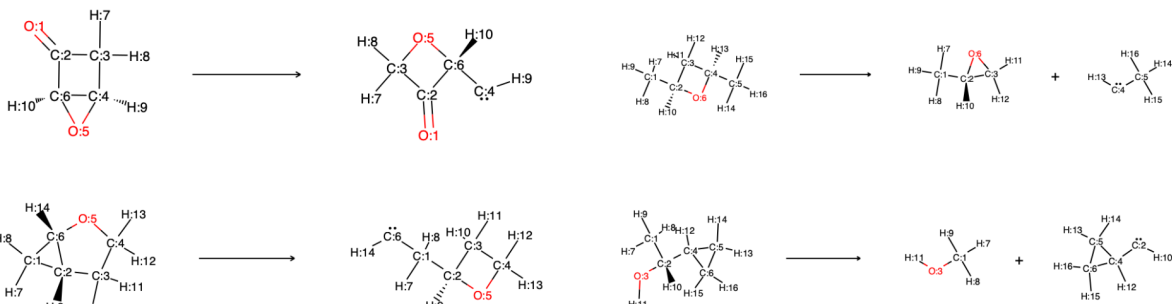

5. +C-C#N,-C-N#C (110 reactions)

SMARTS: [C:1][N+:2]#[C-:3]»[C:1][C:3]#[N:2]

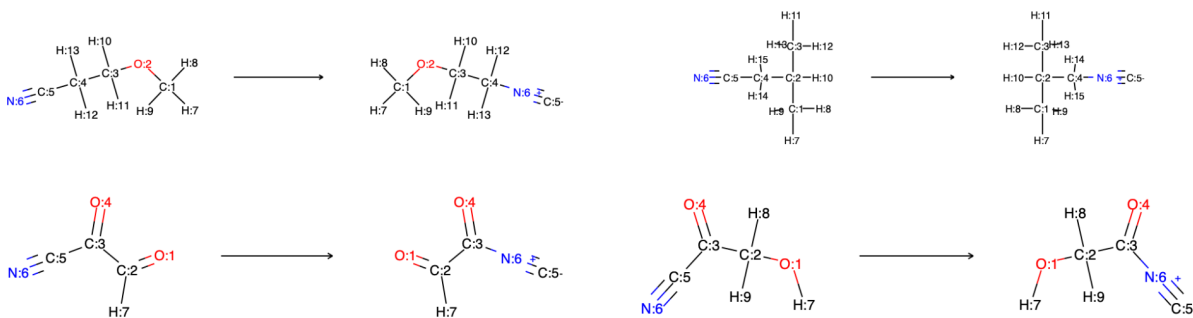

6. +C-C,-C-C,-C-C (107 reactions)

SMARTS: [C:1].[C:2][C:3]»[C:2][C:1][C:3]

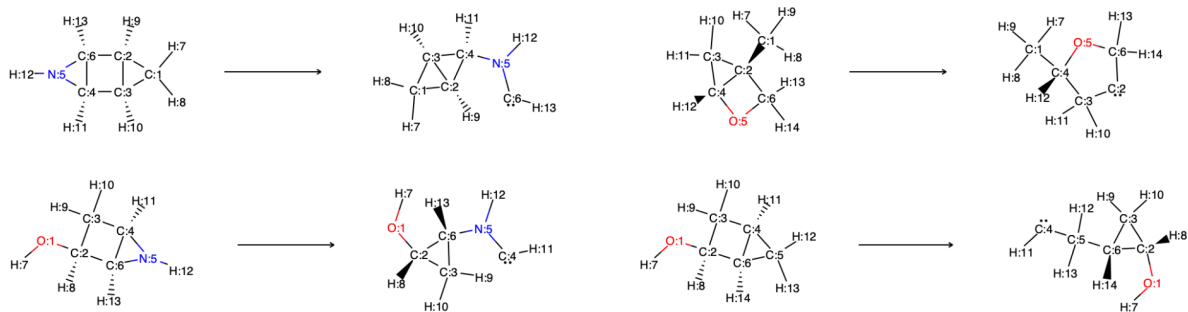

7. +O-H,-C-O,-C-H (107 reactions)

SMARTS: [C:1].[O:2][H:3]>>[C:1]([H:3])[O:2]

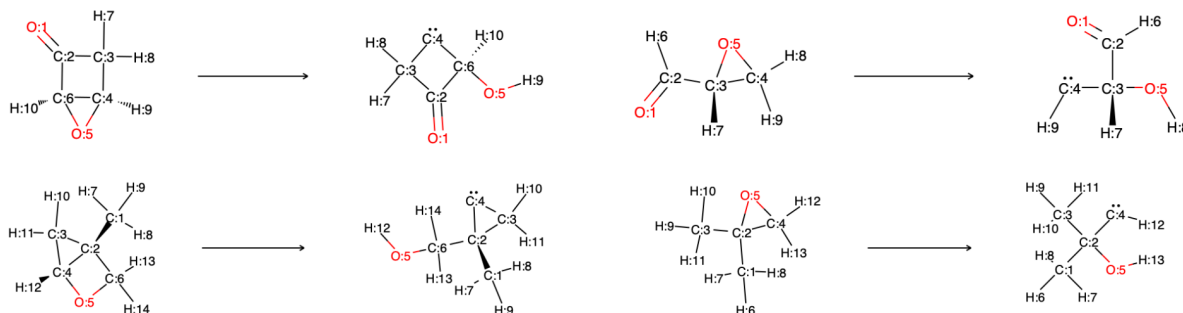

8. +C=C,+C-H,-C-C,-C-H (94 reactions)

SMARTS: [C:1]=[C:2].[C:3][H:4]>>[C:3][C:1][C:2][H:4]

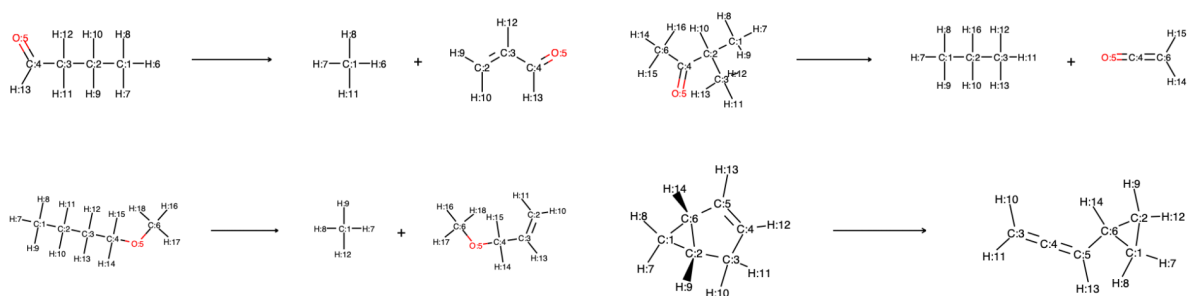

Top  $\Delta\Delta G_{\text{solv}}^\ddagger$  error reactions:

MAE = 2.2 kcal/mol

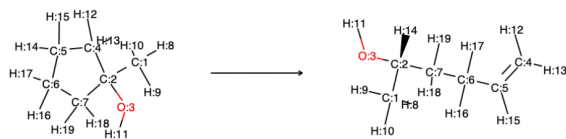

MAE = 1.8 kcal/mol

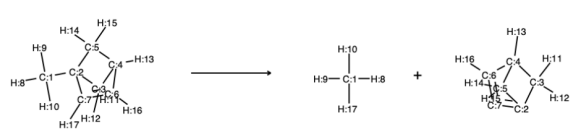

MAE = 1.7 kcal/mol

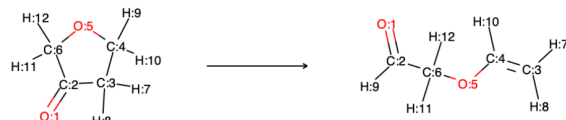

MAE = 1.6 kcal/mol

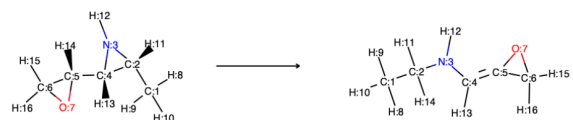

9. +C=O,+C-H,-C-O,-C-C,-C-H (87 reactions)

SMARTS: [C:-1]=[O+:2].[C:3][H:4]»[C:3][C:1]([H:4])[O:2]

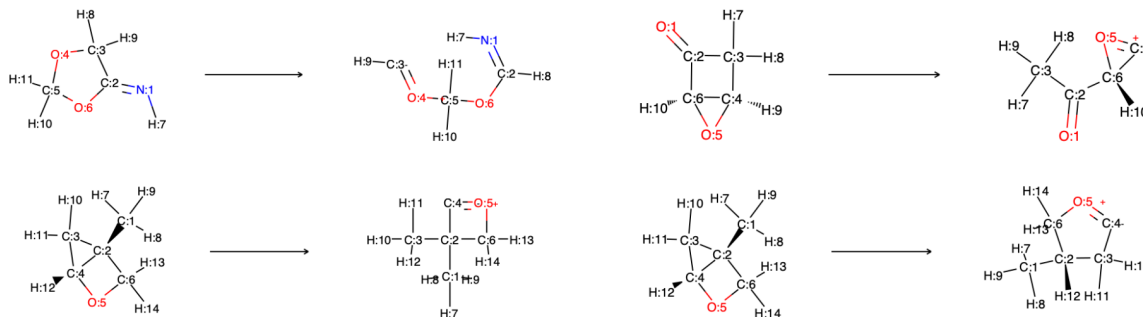

10. +C=C,+O-H,-C=O,C-H (79 reactions)

SMARTS: [C:1]=[C:2][O:3][H:4]»[C:1]([C:2]=[O:3])[H:4]

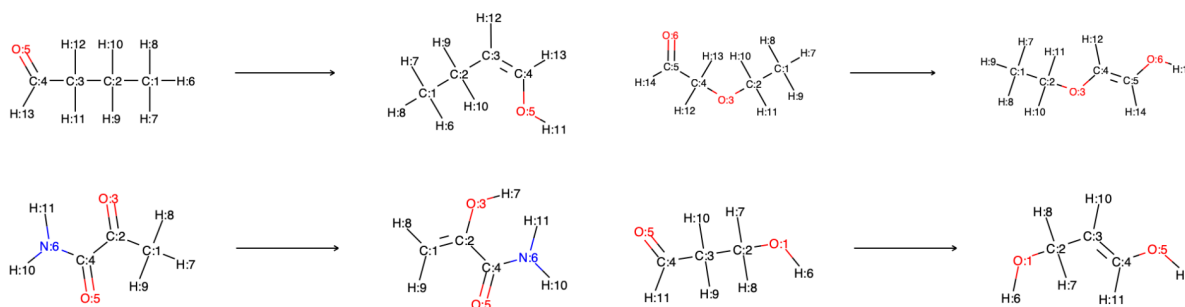

## References

- [1] Grambow, C. A.; Pattanaik, L.; Green, W. H. Reactants, products, and transition states of elementary chemical reactions based on quantum chemistry. *Sci. Data* **2020**, *7*.
- [2] Grambow, C. A.; Pattanaik, L.; Green, W. H. Reactants, products, and transition states of elementary chemical reactions based on quantum chemistry (1.0.1) [Data set]. *Zenodo* **2020**, DOI: 10.5281/zenodo.3715478.
- [3] Grambow, C. A. Reactants, products, and transition states of radical reactions (1.0.0) [Data set]. *Zenodo* **2020**, DOI: 10.5281/zenodo.3731554.
